# Supplementary material for: Jasmonic Acid-Induced VQ-Motif-Containing Protein OsVQ13 Influences the OsWRKY45 Signaling Pathway and Grain Size by Associating with OsMPK6 in Rice
Source: MDPI journal article supplement (doi:10.3390/ijms20122917), 2019-06-14
Supplement: s1 [file s1]

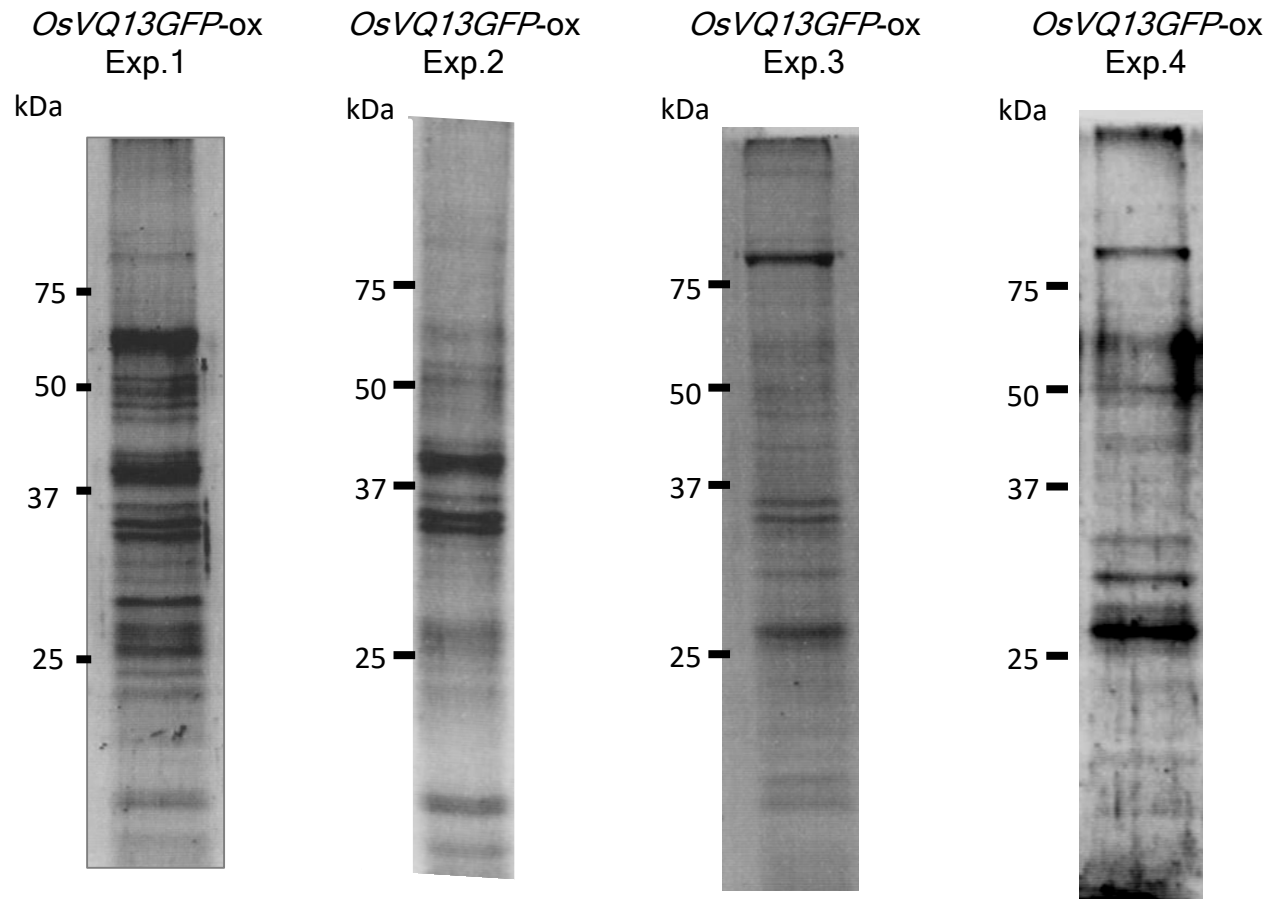

**Supplementary Figure S1.** Separation of the proteins co-purified with GFP-Trap from *OsVQ13GFP-ox* overexpressing rice plants (*OsVQ13GFP-ox*) by SDS-PAGE. Protein bands were visualized by Oriole staining. The numbers on the left indicate the position of the protein size markers in kDa. We performed TOF-MS analysis without taking a photograph of the stained gel at the fifth time.
