# Supplementary material for: Jasmonic Acid-Induced VQ-Motif-Containing Protein OsVQ13 Influences the OsWRKY45 Signaling Pathway and Grain Size by Associating with OsMPK6 in Rice
Source: Int J Mol Sci. 2019 Jun 14;20(12):2917. doi: 10.3390/ijms20122917 (PMC6627515; doi:10.3390/ijms20122917)
Supplement: Supplementary file 1 [file ijms-20-02917-s001.zip › Supplementary Table S1.xlsx]

## Sheet: Primer sequences for qRT-PCR
Supplementary Table S1. Sequences of gene-specific primers used for RT-qPCR
Accession number	Gene name	Sense primer (5'- 3')	Antisense primer (5'- 3')
AK109228	OsVQ13	TCCCACACATTCCTGTTCAT	ACTTGCAAGCATTTTGGGAT
AK067834	OsWRKY62	TTGTCGTGTGCTTCCACATT	CGGCAATACGAACTGATGAA
AK072220	cytochrome P450	GCCTCAAGCTGTAGGGAGAA	AACTCCTACCAGCGAAGTGG
AK104193	OsOPR5	CCTGATGTAGGTGTTGGTGGT	CATGCTGGATGCAACAATTT
AK061206	OsPrx126	CCTGATGTAGGTGTTGGTGGT	CATGCTGGATGCAACAATTT
AK067416	OsPrx72	ACCAAGGATTGACGATTGCT	GGCAGAGACAGGAGAGGATG
AK103453	OsGSTU4	GGAGAGCAGCTTGGAGAATG	CATGGTAACTGACGCCATTG
AK064395	UDP-glucosyltransferase	TGGATATGTTTGGTTATGTCGTG	TCTCCCAAATAATTTTTCCAACA
AK105387	Proteinase inhibitor I20	TGTGCACGATTCATGTAAACAG	TTGCAGACATAAACCATCAAAAA
AK068247	beta-1,3-glucanase	GAACGTACGGCCAGCATATAG	CAAAGTGCCAAGGCAGAGTT
AK111942	OsMPK6	CGCACGCTCAGGGAGATC	GGTATGATATCCCTTATGGCAACAA
AK066255	OsWRKY45	CCGAAGAATCATGGATGGAC	GCGCTGCCGCTAATTATTTC
AK060893	Actin	GAGTATGATGAGTCGGGTCCAG	ACACCAACAATCCCAAACAGAG
